# Supplementary material
Source: Springer Nature journal article supplement (https://www.springermedizin.de/resource/supplementary/12879_2009_962_MOESM1_ESM.PDF/9449738)
Supplement: MOESM1 [file 9449738]

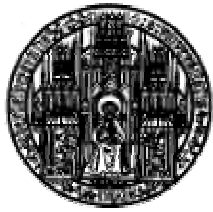

*Universitätsklinikum Heidelberg  
Abteilung Tropenhygiene und öffentliches Gesundheitswesen*

*MuT-Studie*

*Migration und Tuberkulose in Baden-Württemberg*

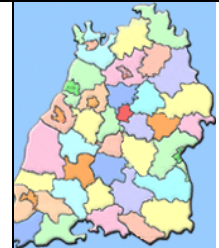

## Fragebogen Baden-Württemberg für Indexpersonen

*Dieser Fragebogen wird von den Patienten selbst u.U. mit Hilfe eines/-r  
Mitarbeiters/-in des Gesundheitsamts ausgefüllt.*

### Vom Gesundheitsamt auszufüllen:

Gesundheitsamt: \_\_\_\_\_

GA-Kennung (Octoware): 1.08.\_\_\_\_.

MeldungsNr. (Octoware) der befragten Indexperson:

[ \_ \_ \_ \_ \_ ]

MeldungsNr. (Octoware) falls im GA bekannt [ \_ \_ \_ \_ \_ ]  
des in Frage 26 genannten „bekannten Kontaktes zu einem Tuberkulosepatienten“

Datum der Befragung (Tag/Monat): \_\_\_\_/\_\_\_\_/200\_\_

# MuT-Studie: Migration und Tuberkulose in Baden-Württemberg

(1) What is your month and year of birth?    /       
month year

(2) What is your sex?

- ☐ female  
☐ male

(3) What is the zipcode of your town of residence?

(4) Where do you live? (*tick one!*)

- ☐ in your own flat /apartment/ house → **Please go to question number 5!**  
☐ no permanent address  
☐ in communal accommodation  
☐ in an old people's/nursing home  
☐ in a place of detention  
☐ other:.....  
☐ unknown / no information available } **Please go to question number 7!**

(5) How many rooms does your flat have (without kitchen and bathroom)?

Give number in box:

(6) How many people live in your flat – including yourself?

Give number in box:

(7) Where do people you are living with come from?  
(What are their countries of origin?)

---

---

---

(8) At home, how many people have slept in the same room as you lately?

- ☐ you alone  
☐ 2-5 persons  
☐ more than 5 persons

(9) Where do your closest neighbours come from?  
(What are their countries of origin?)

---

---

---

## MuT-Studie: Migration und Tuberkulose in Baden-Württemberg

(10) Do you currently go to regular school or vocational school?

- ☐ yes
- ☐ no
- ☐ unknown / no information available

(11) Do you currently go to university or polytech?

- ☐ yes
- ☐ no
- ☐ unknown / no information available

(12) Do you currently attend any other classes?

- ☐ yes
- ☐ no
- ☐ unknown / no information available

(13) What did you train for? .....

(14) Are you currently employed?

- ☐ yes
- ☐ no → **Please go to question number 18!**
- ☐ unknown / no information available

(15) For how many years have you been in this job?

- ☐ for less than 1 year
- ☐ for 1-5 years
- ☐ for more than 5 years
- ☐ unknown / no information available

(16) Describe your present job? .....

(17) In which sector/trade/industry do you work? .....

(18) With whom do you spend your time at work/ at school  
(What are their countries of origin?)

---

---

---

☐ I'm unemployed / I don't go to school at present

(19) Do you spend much of your spare time with people –other than your family?

- ☐ yes, almost daily
- ☐ yes, from time to time
- ☐ seldom or never

## MuT-Studie: Migration und Tuberkulose in Baden-Württemberg

(20) Do you go to a place of worship (e.g. church, mosque...) where you meet people of your religion?

- ☐ never
- ☐ seldom
- ☐ once a week
- ☐ twice/three times a week
- ☐ more often
- ☐ unknown / no information available

(21) Do you go to clubs/pubs etc.?

- ☐ never
- ☐ seldom
- ☐ once a week
- ☐ twice/three times a week
- ☐ more often
- ☐ unknown / no information available

(22) Where do the people you meet in your spare time come from?  
(What are their countries of origin?)

---

---

---

(23) Do you have a warm meal regularly (i.e. more than 4 times a week)

- ☐ yes
- ☐ no

(24) Do you smoke?

- ☐ yes
- ☐ no

(25) Do you drink alcohol every day?

- ☐ yes
- ☐ no

(26) Have you had contact with a known tuberculosis patient within the last 3 years?

- ☐ No / unknown → **Please go to question number 29!**
- ☐ Yes

(27) What was the country of origin of this tuberculosis patient?.....

## MuT-Studie: Migration und Tuberkulose in Baden-Württemberg

- (28) In which country did the contact take place? .....
- (29) What is:
- (29a) your country of birth? .....
- (29b) your nationality/citizenship? / Which passport do you have?  
(Multiple answers possible!).....
- (29c) your ethnic origin? .....
- (29d) the country of birth of your mother? .....
- (29e) the country of birth of your father? .....
- (29f) the country where you lived longest  
before you came to Germany? .....
- (30) Please give us the month and year of your first entry to Germany:
- |\_|\_| / |\_|\_|\_|\_|  
month year
- ☐ unknown / no information available
- (31) Have you visited your country of origin, or that of your parents, since then?
- ☐ no ➔ **Please go to number 33!**
- ☐ my country of origin and that of my parents is Germany >**Please go to number 33!**
- ☐ yes
- ☐ unknown / no information available
- (32) Please tell us the entire duration of your stay there for the past 3 years:  
*Give us the number in the small box:*
- 2003 [ ] weeks
- 2002 [ ] weeks
- 2001 [ ] weeks
- 2000 [ ] weeks
- ☐ my last visit was before 2000
- (33) Do you have close relatives not living in Germany?
- ☐ no
- ☐ yes, in particular: *(Multiple answers possible!)*
- ☐ mother
- ☐ father
- ☐ wife/ husband
- ☐ children under 15
- ☐ children over 15
- ☐ sisters / brothers
- ☐ unknown / no information available

## MuT-Studie: Migration und Tuberkulose in Baden-Württemberg

(34) Which language do you mainly speak here in Germany?

- ☐ German
- ☐ other languages

(35) Do you read German newspapers?

- ☐ never
- ☐ sometimes
- ☐ regularly

(36) How do you judge your knowledge of **German**?

Speaking:

- ☐ fluent
- ☐ good
- ☐ basic
- ☐ poor
- ☐ I cannot speak it at all

Writing:

- ☐ fluent
- ☐ good
- ☐ basic
- ☐ poor
- ☐ I cannot write it at all

(37) How do you judge your knowledge of **your mother tongue** (if not German)?

Speaking:

- ☐ fluent
- ☐ good
- ☐ basic
- ☐ poor
- ☐ I cannot speak it at all

Writing:

- ☐ fluent
- ☐ good
- ☐ basic
- ☐ poor
- ☐ I cannot write it at all

Thank you very much for your cooperation
